# Supplementary material
Source: MDPI journal article supplement (https://www.mdpi.com/2073-8994/15/2/373)
Supplement: s1 [file s1]

## Enantioseparation of $\beta$ -blockers using silica-immobilised eremomycine derivatives as chiral stationary phases in HPLC

Pavel N. Nesterenko, Ruslan Puzankov, Mikhail Kuznetsov, Nikita Sarvin, and Sergey M. Staroverov

### Mass-spectrometry of eremomycin and its aglycons

Structures of all products synthesized in 2.1.1 and 2.1.2 sections were confirmed using mass spectrometer Finnigan LTQ (ThermoFisher, USA) with electrospray ionization. The spectra demonstrated corresponding masses of eremomycin (1557), des-eremosaminyl eremomycin (1414), eremosaminyl aglycon (1252), and eremomycin aglycon (1109). Additionally, these spectra (Supplementary, Figure 1-4) show the presence of sodium and potassium salts of these compounds, as well as products of partial degradation of the samples during the experiment.

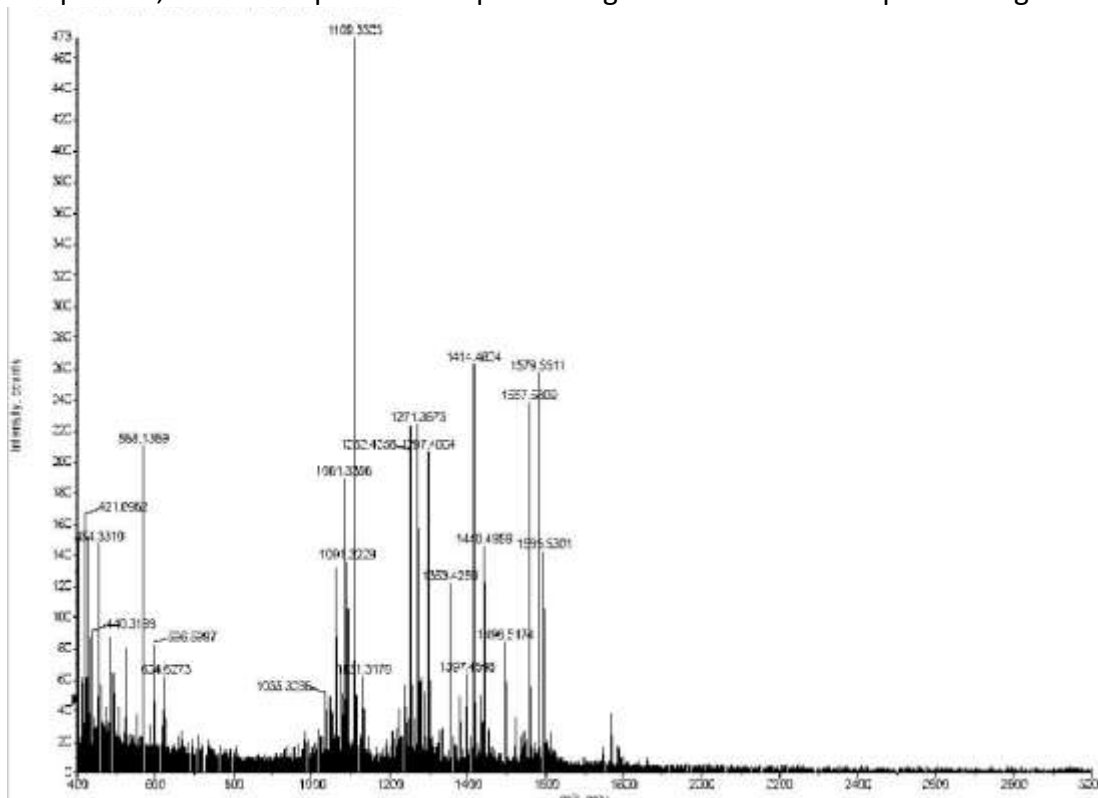

Figure S1. Mass spectrum of eremomycin.

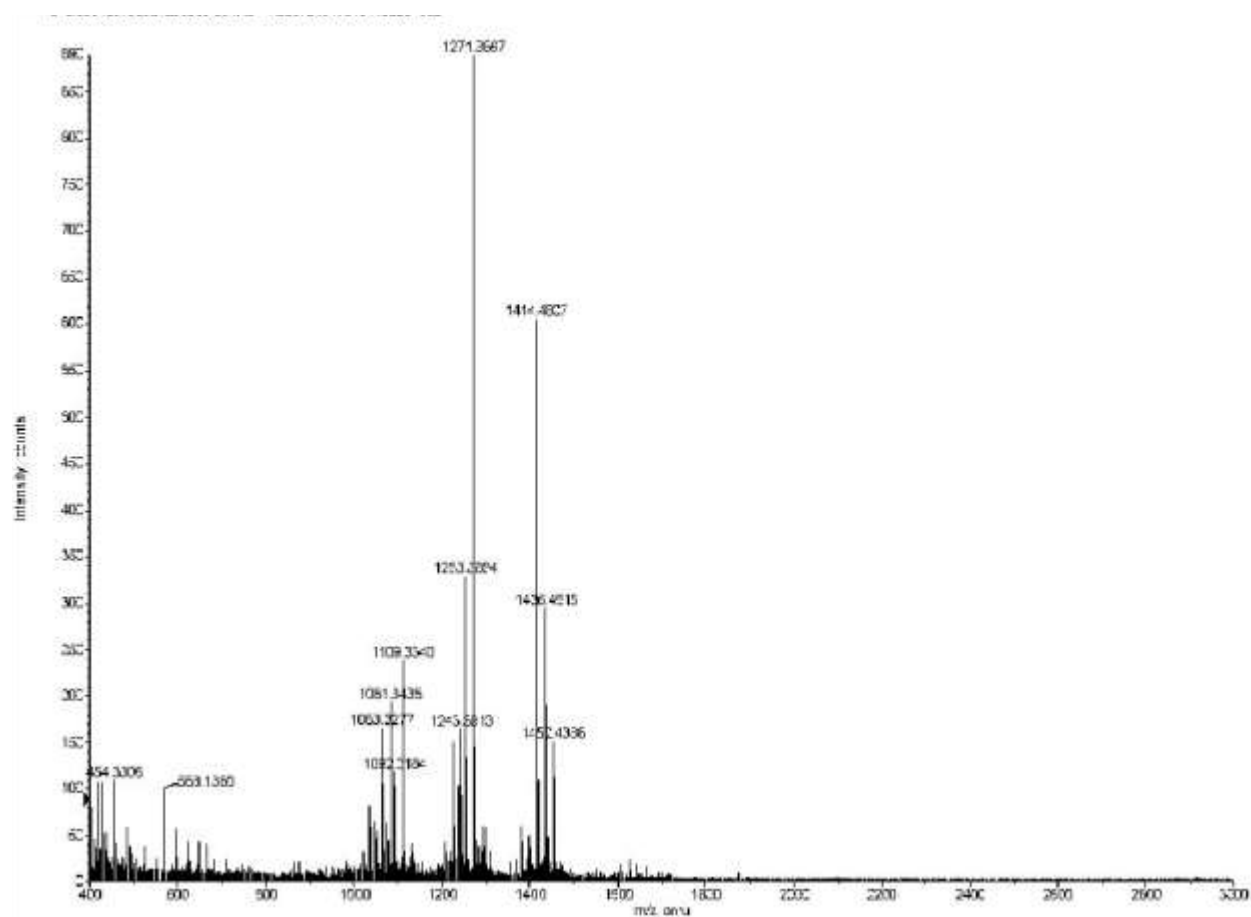

Figure S2. Mass spectrum of des-eremosaminyleremomycin (DEE).

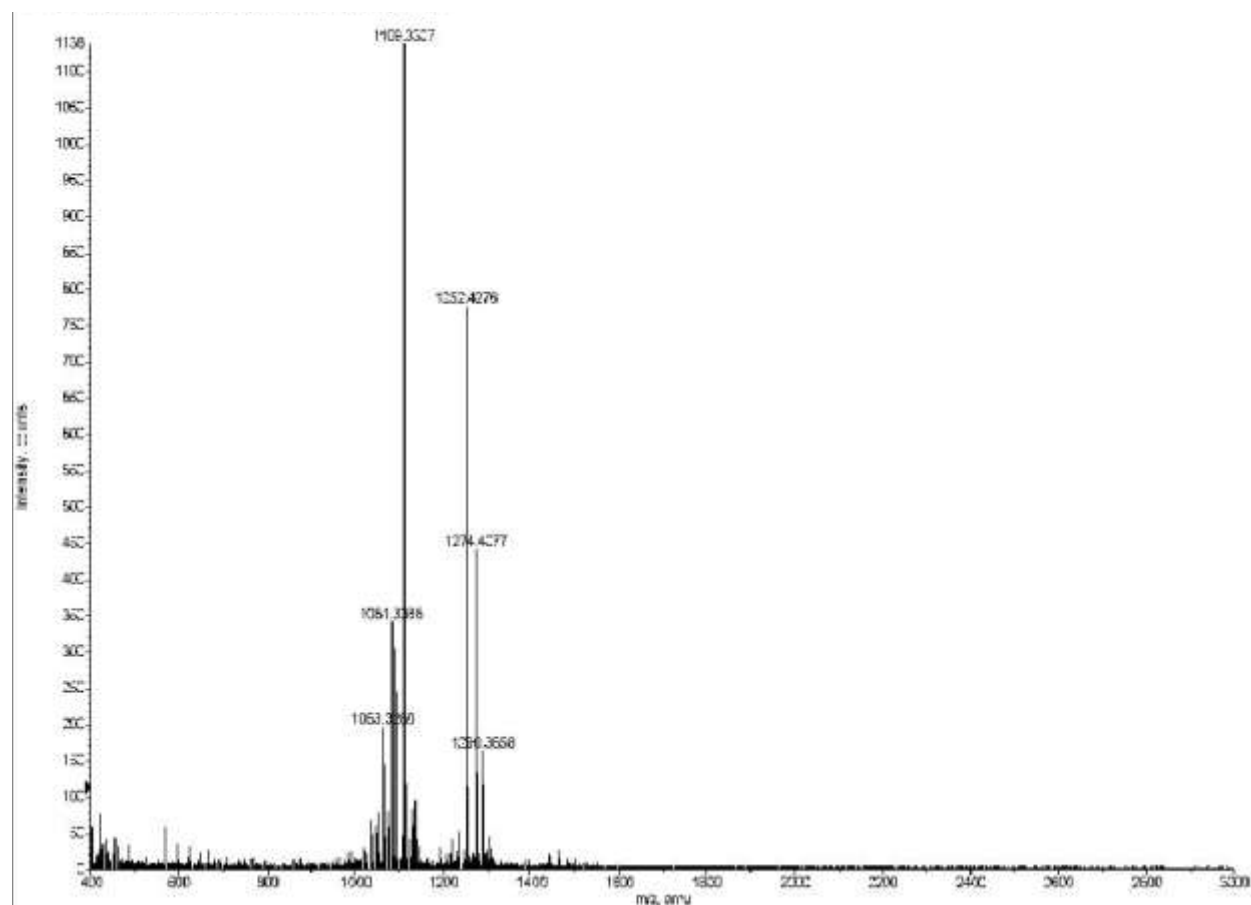

Figure S3. Mass spectrum of eremosaminyleremomycin aglycone (EEA).

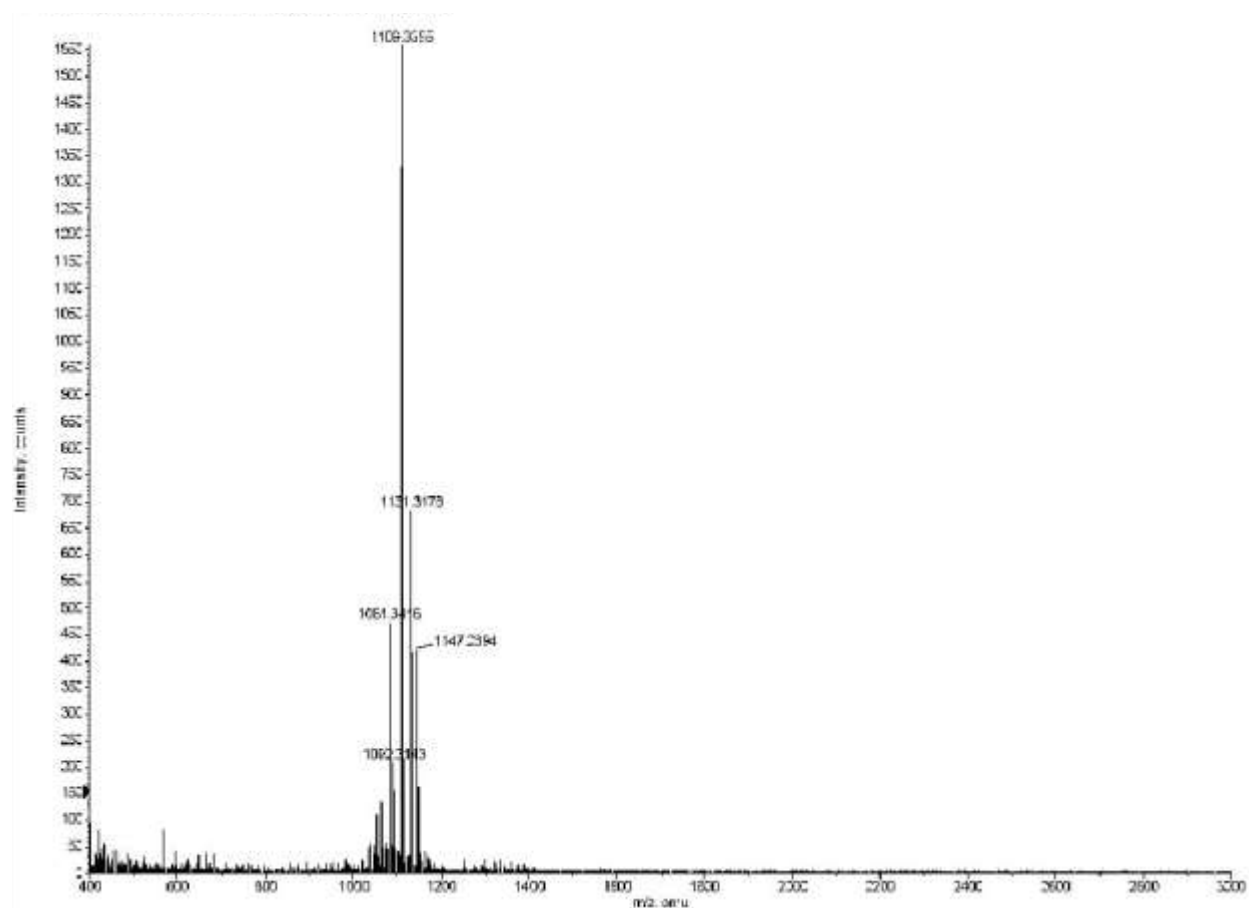

Figure S4. Mass spectrum of eremomycin aglycone (EAg).
