# Supplementary material
Source: MDPI journal article supplement (https://www.mdpi.com/2073-8994/15/2/373)
Supplement: s1 [file s1]

Archive with 1 entries (1 files):
- symmetry-2164294-supplementary.pdf
